# Supplementary material
Source: ML conference proceedings conference paper supplement (https://openaccess.thecvf.com/content/CVPR2024/html/Liu_Sparse_Global_Matching_CVPR_2024_paper.html)
Supplement: Supplementary file 1 [file Liu_Sparse_Global_Matching_CVPR_2024_supplemental.pdf]

# Sparse Global Matching for Video Frame Interpolation with Large Motion

## Supplementary Material

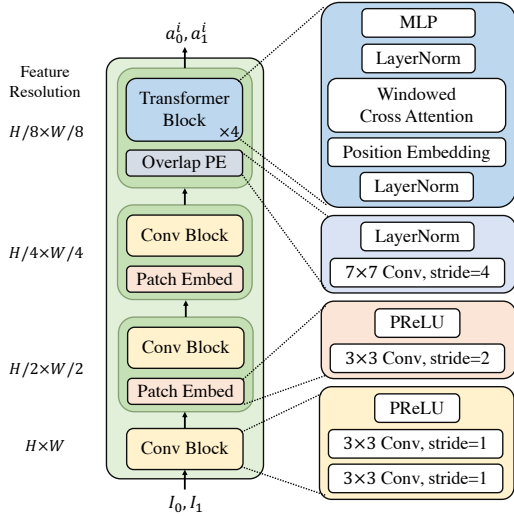

Figure A1. Model Structure of Local Feature Branch.  $a_0^i, a_1^i, i \in \{0, 1, 2, 3\}$  is the extracted local feature, corresponding to the feature resolution of  $\{H \times W, H/2 \times W/2, H/4 \times W/4, H/8 \times W/8\}$

### A. Local Feature Branch Model Structure

#### A.1. Local Feature Extractor

The structure of our local feature extractor is illustrated in Figure A1. As mentioned in Section 3.1, we adopt a CNN and Transformer hybrid structure for local feature extraction. This design diverges from that of EMA-VFI[37] by reducing the network depth. Furthermore, to enhance discriminability within local windows, we incorporate sine-cosine positional embeddings before the windowed cross-attention operation.

#### A.2. Flow Estimation

The Flow Estimation Structure, depicted in Figure 1, consists of two sequential Flow Estimation blocks, as shown in Figure A2. These two blocks are not identical. The first block, detailed in Figure A2 takes input frames  $I_0, I_1 \in H \times W \times 3$  and local features  $a_0^3, a_1^3 \in H/8 \times W/8 \times C_3$  as input. Its output includes the initial intermediate flow estimations  $\tilde{F}_{t \rightarrow 0}, \tilde{F}_{t \rightarrow 1}$ , along with the initial fusion map  $\tilde{M}$ .

When pretraining on Vimeo-90K,  $\tilde{F}_{t \rightarrow 0}, \tilde{F}_{t \rightarrow 1}$  and  $\tilde{M}$  are directly fed into the second block, along with warped images  $I_{0 \rightarrow t}, I_{1 \rightarrow t}$  and the finer local features  $a_0^2, a_1^2 \in H/4 \times W/4 \times C_2$ . In the stages of finetuning and inference, however,  $\tilde{F}_{t \rightarrow 0}, \tilde{F}_{t \rightarrow 1}$  and  $\tilde{M}$  are processed by the

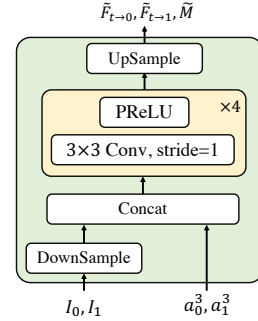

Figure A2. Model Structure of the Initial Flow Estimation Block.

sparse global matching block for correction, resulting in refined flow estimations  $F_{t \rightarrow 0}, F_{t \rightarrow 1}$  and an updated fusion map  $M$ , which are then input to the second block with  $I_{0 \rightarrow t}, I_{1 \rightarrow t}$  and  $a_0^2, a_1^2$ .

#### A.3. Refine Net

We follow a similar design in RIFE[9]. We use Context Net to first extract the low-level contextual features. These features are then processed through backward warping, guided by the intermediate flows. The refinement stage involves a U-net shaped network, which can enhance the output frame in a residual form, using the warped features and flows.

### B. Model Loss

We use the same training loss with EMA-VFI [37], which is the combination of Laplacian loss and warp loss, defined as:

$$\mathcal{L} = \mathcal{L}_{\text{lap}} + \lambda \sum_i \mathcal{L}_{\text{warp}}^i \quad (12)$$

where  $\lambda$  is the loss weight for warp loss. Following [37], we set  $\lambda = 0.5$ .

### C. Generalizability

We apply our sparse global matching block on RIFE[9] and EMA[37] to show that our two-step strategy is applicable in more similar flow-based structures. The result is presented in Table A2 and Table A1 accordingly.

### D. Scalability

We scaled our model to a bigger model size with 59.3M parameters, basically aligned with EMA-VFI-base [37] which

Table A1. **Results after applying sparse global matching block on EMA-VFI-small.**  $1/N$  means that we sparsely select  $1/N$  points of the initial intermediate flows estimation.

|             | X-Test-L            |                     | SNU-FILM-L          |                     | Xiph-L              |                     |
|-------------|---------------------|---------------------|---------------------|---------------------|---------------------|---------------------|
|             | 2K                  | 4K                  | hard                | extreme             | 2K                  | 4K                  |
| EMA-VFI     | 29.51/0.8775        | 28.60/0.8733        | 28.57/0.9189        | 23.18/0.8292        | 30.54/0.8718        | 28.40/0.8109        |
| EMA-VFI-1/8 | 29.65/0.8788        | 28.77/0.8753        | 28.62/0.9192        | 23.31/0.8306        | 30.59/0.8712        | 28.61/0.8114        |
| EMA-VFI-1/4 | 29.81/0.8816        | 28.91/0.8776        | 28.68/0.9196        | 23.41/0.8326        | <b>30.64/0.8720</b> | 28.78/0.8128        |
| EMA-VFI-1/2 | <b>30.12/0.8886</b> | <b>29.24/0.8840</b> | <b>28.70/0.9196</b> | <b>23.46/0.8343</b> | <b>30.63/0.8722</b> | <b>28.91/0.8146</b> |

Table A2. **Results after applying sparse global matching block on RIFE.**  $1/N$  means that we sparsely select  $1/N$  points of the initial intermediate flows estimation.

|          | X-Test-L            |                     | SNU-FILM-L          |                     | Xiph-L              |                     |
|----------|---------------------|---------------------|---------------------|---------------------|---------------------|---------------------|
|          | 2K                  | 4K                  | hard                | extreme             | 2K                  | 4K                  |
| RIFE     | 29.87/0.8805        | 28.98/0.8756        | 28.19/0.9172        | 22.84/0.8230        | 30.18/0.8633        | 28.07/0.7982        |
| RIFE-1/8 | 30.50/0.8902        | 29.52/0.8838        | 28.61/0.9189        | 23.35/0.8298        | 30.26/0.8637        | 28.45/0.8023        |
| RIFE-1/4 | 30.68/0.8981        | 29.72/0.8901        | 28.63/0.9191        | <b>23.52/0.8340</b> | 30.30/0.8643        | 28.66/0.8048        |
| RIFE-1/2 | <b>30.88/0.9034</b> | <b>29.90/0.8944</b> | <b>28.66/0.9195</b> | <b>23.52/0.8350</b> | <b>30.35/0.8656</b> | <b>28.69/0.8066</b> |

has 65.7M parameters. Results listed in Table D3. From Table D3, we can draw the following conclusion.

As more points are incorporated into sparse global matching, the performance gradually saturates. This observation is intuitive, considering that not every aspect of the initial estimated flow is inaccurate, nor is every aspect of the global matching flow entirely precise. This is evidenced by Table 5, where the merge block is absent in this ablation. However, upon integrating the merge block (refer to Table 3), with more points are involved, up to full global matching, performance still has a little improvement with increased point involvement, meaning that there is still potential for enhancement within the local branch of the smaller model with the help of our merge block.

But when we change our model with a larger local branch with more parameters, the capacity of the local branch becomes stronger. Consequently, it becomes evident that involving all points in global matching leads to performance degradation compared to utilizing only half the points, thus affirming our pursuit of sparsity.

## E. Model Size Comparisons

We conduct a series of parameters and runtime comparisons on an Nvidia RTX 2080Ti GPU. Illustrated in Table E4, our local branch is aligned with EMA-VFI-small in terms of runtime and parameters, therefore, we mainly compare our results with EMA-VFI-small model setting.

Table D3. **Results on a larger local branch.** Note that we disable the test-time augmentation when testing for direct comparison.

|                      | XTest-L-2K   |               |
|----------------------|--------------|---------------|
|                      | PSNR         | SSIM          |
| EMA-VFI [37]         | 30.85        | 0.9005        |
| Ours-local branch    | 30.68        | 0.9010        |
| Ours-1/8             | 31.10        | 0.9080        |
| Ours-1/4             | 31.19        | 0.9102        |
| Ours-1/2             | <b>31.27</b> | <b>0.9115</b> |
| Full Global Matching | 31.20        | 0.9104        |

Table E4. **Comparisons of model size and corresponding performance.** We only list the X-Test-L-2K results for simplicity.

|                   | Inference Time on 512x512 Resolution | Parameters  | X-Test-L-2K  |               |
|-------------------|--------------------------------------|-------------|--------------|---------------|
|                   |                                      |             | PSNR         | SSIM          |
| RIFE              | <b>10ms</b>                          | 10M         | 29.87        | 0.8805        |
| EMA-VFI-small     | 25ms                                 | 14.5M       | 29.51        | 0.8775        |
| EMA-VFI-base      | 132ms                                | 65.7M       | 30.85        | 0.9003        |
| XVFI              | 22ms                                 | <b>5.6M</b> | 29.82        | 0.8493        |
| BiFormer          | 59ms                                 | 11M         | 30.32        | 0.9067        |
| Ours-local-branch | 23ms                                 | 15.4M       | 30.39        | 0.8946        |
| Ours-1/2-Points   | 74ms                                 | 20.8M       | <b>31.03</b> | <b>0.9075</b> |

## F. Different Flow Reversal Techniques

We compare our flow shift strategy with the flow reversal layer in [35], complementary flow reversal in [29], lin-

Table F5. Comparisons between different flow reversal techniques.

|                          | X-Test-L-2K  |               | X-Test-L-4K  |               |
|--------------------------|--------------|---------------|--------------|---------------|
|                          | PSNR         | SSIM          | PSNR         | SSIM          |
| flow reversal layer [35] | 30.57        | 0.8977        | 29.45        | 0.8886        |
| CFR [29]                 | 30.73        | 0.9001        | 29.63        | 0.8913        |
| linear combination [13]  | 30.69        | 0.9000        | 29.59        | 0.8907        |
| CNN layer                | 30.18        | 0.8932        | 29.13        | 0.8853        |
| linear reversal          | 30.70        | 0.9017        | 29.59        | 0.8924        |
| flow shift (Ours-1/8)    | <b>30.83</b> | <b>0.9022</b> | <b>29.73</b> | <b>0.8928</b> |

Table G6. 8× Interpolation Results on X-Test (PSNR).

|                      | X-Test (8× interpolation) |                     |
|----------------------|---------------------------|---------------------|
|                      | 2K                        | 4K                  |
| EMA-VFI-small-t [37] | 31.75/0.9164              | 30.59/0.9078        |
| RIFE-m [9]           | 32.23/0.9229              | 31.09/0.9141        |
| FILM [27]            | 31.50/0.9162              | OOM                 |
| Ours-1/2             | <b>32.38/0.9272</b>       | <b>31.35/0.9179</b> |

ear combination in [13], CNN layer and linear reversal on Ours-1/8 setting. Shown by Table F5, our flow-shifting strategy is the most suitable for sparsely sampled flows.

## G. Interpolating multiple frames into two frames

We follow the recursive interpolation method in FILM [27] and present our multi-frame interpolation (between two frames) results in Table G6.

## H. Finetuning or Training From Scratch

In our experiments, we conducted training from scratch on the Vimeo-90K [4] dataset using a sparse global matching block with full global matching. This approach still demonstrated noticeable effects attributed to the global matching process. However, as indicated in Table H7, the ability to capture large motion was not on par with the results obtained after finetuning on a dataset with larger motion. Therefore, finetuning on a small batch of large motion datasets (X-Train) is more efficient than training from scratch on a large batch of small motion datasets (Vimeo-90K). This efficiency is evidenced by the reduced number of required training steps, with finetuning necessitating only 13.7k steps as opposed to 480k steps for training from scratch. This finding aligns with the observations reported in FILM [27], suggesting that large motion datasets can bring large motion capturing ability.

Table H7. Comparisons between from scratch and finetuning.

|                     | X-Test-L-2K  |               | X-Test-L-4K  |               |
|---------------------|--------------|---------------|--------------|---------------|
|                     | PSNR         | SSIM          | PSNR         | SSIM          |
| Ours-local-branch   | 30.39        | 0.8946        | 29.25        | 0.8861        |
| Global-From Scratch | 30.63        | 0.9012        | 29.61        | 0.8958        |
| Global-Finetuning   | <b>31.03</b> | <b>0.9074</b> | <b>29.95</b> | <b>0.8974</b> |

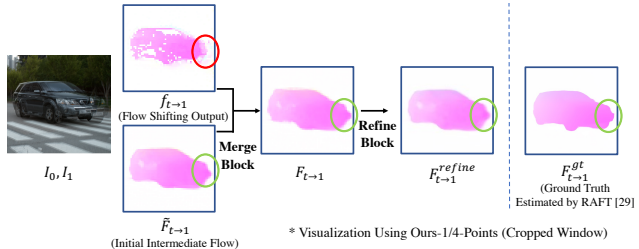

Figure I3. Visualization of Matching Failure and Repair

| Operations                   | Inference Time |
|------------------------------|----------------|
| Local Feature Branch         | 23 ms          |
| Flow Compensation Branch     | 50.6 ms        |
| - Global Feature Extraction  | <b>45 ms</b>   |
| - Others                     | 5.6 ms         |
| (512 × 512 Resolution) Total | 73.6ms         |

Table J8. Time Profile on Our Proposed Algorithm. Measured on an Nvidia RTX 2080Ti GPU.

## I. Failed Matching

When matching fails, the merge block in our method can adaptively merge the flows, depressing the impact of matching failure. Moreover, we have a refine block to further repair the merged flow. We also provide a visualization in Figure I3.

## J. Inference Speed Bottleneck

As shown in Table J8, the bottleneck of our pipeline lies in the global feature extractor, instead of other parameter-free components. One naive solution is to replace it with a simpler and lighter global feature extractor in the future. And another solution is to distill the global feature extraction ability from GMFlow [34] to our own feature extractor, which needs more experiment and probably even training data from optical flow datasets.
